# Supplementary material for: A new approach to study semi-coordination using two 2-methyl-5-nitroimidazole copper(ii) complexes of biological interest as a model system
Source: Royal Society of Chemistry journal article supplement (doi:10.1039/d3ra02130k), 2023-01-01
Supplement: d3ra02130k1.pdf [file d3ra02130k1.pdf]

## SUPPLEMENTARY MATERIAL

### A new approach to study semi-coordination using two 2-methyl-5-nitroimidazole copper(II) complexes of biological interest as a model system

Lucas G. Fachini<sup>a</sup>, Gabriel B. Baptistella<sup>a</sup>, Kahoana Postal<sup>a</sup>, Francielli S. Santana<sup>a</sup>, Emanuel M. de Souza<sup>b</sup>, Eduardo L. Sá<sup>a</sup>, Ronny R. Ribeiro<sup>a</sup>, Giovana G. Nunes<sup>a\*</sup>

<sup>a</sup>Departamento de Química, UFPR, Curitiba-PR, Brasil.

<sup>b</sup>Departamento de Bioquímica e Biologia Molecular, UFPR, Curitiba-PR, Brasil

**Table S1.** Comparison between bond lengths (Å) and angles (°) obtained through DRX-single crystal and DFT calculations for product **1** B3LYP/LANL2DZ

|                             | DRX              | DFT     |
|-----------------------------|------------------|---------|
|                             | Bond lengths / Å |         |
| Cu–O(1w)                    | 1.94988          | 1.94988 |
| Cu–O(1)                     | 2.60642          | 2.60642 |
| Cu–N(2)                     | 1.99355          | 2.02068 |
| O(1)–N(1)                   | 1.23795          | 1.30158 |
| O(2)–N(1)                   | 1.21906          | 1.26275 |
| C(3)–N(1)                   | 1.42402          | 1.43568 |
| C(3)–C(4)                   | 1.35937          | 1.38636 |
| C(4)–N(3)                   | 1.35545          | 1.38146 |
| C(2)–N(3)                   | 1.35483          | 1.38614 |
| C(2)–N(2)                   | 1.32490          | 1.35239 |
| C(1)–C(2)                   | 1.48010          | 1.49540 |
|                             | Angles / °       |         |
| O(1w)–Cu–O(1w) <sup>i</sup> | 180.0            | 179.685 |
| N(2)–Cu–N(2) <sup>i</sup>   | 180.0            | 177.799 |
| O(1)–Cu–O(1) <sup>i</sup>   | 180.0            | 163.308 |
| O(1)–Cu–O(1w)               | 88.150           | 98.947  |
| N(2)–Cu–O(1w)               | 90.180           | 88.943  |
| O(1)–Cu–N(2)                | 69.917           | 72.046  |
| O(1)–Cu–N(2) <sup>i</sup>   | 110.083          | 108.172 |
| Cu–O(1)–N(1)                | 108.579          | 107.862 |
| O(1)–N(1)–O(2)              | 124.228          | 124.299 |
| O(2)–N(1)–C(3)              | 118.368          | 118.901 |
| N(2)–C(3)–N(1)              | 120.085          | 121.852 |
| N(1)–C(3)–C(4)              | 128.566          | 127.863 |
| C(3)–C(4)–N(3)              | 104.140          | 104.449 |
| C(2)–N(3)–C(4)              | 109.614          | 110.388 |
| N(2)–C(2)–N(3)              | 109.589          | 108.058 |
| N(3)–C(2)–C(1)              | 124.578          | 124.175 |
| C(2)–N(2)–C(3)              | 105.306          | 106.833 |
| N(2)–C(2)–C(1)              | 125.822          | 127.767 |
| Cu–N(2)–C(2)                | 130.584          | 131.608 |
| Cu–N(2)–C(3)                | 123.598          | 121.396 |

**Table S2.** Comparison between bond lengths (Å) and angles (°) obtained through DRX-single crystal and DFT calculations for product 2 B3LYP/LANL2DZ

|                               | DRX     |                  | DFT     |
|-------------------------------|---------|------------------|---------|
|                               |         | Bond lengths / Å |         |
| Cu–O(1N4)                     | 1.99492 |                  | 1.99491 |
| Cu–O(1)                       | 2.59367 |                  | 2.59367 |
| Cu–N(2)                       | 1.97291 |                  | 1.99290 |
| N(1)–O(1)                     | 1.23134 |                  | 1.28390 |
| N(1)–O(2)                     | 1.22734 |                  | 1.27715 |
| N(1)–C(3)                     | 1.41980 |                  | 1.43409 |
| C(3)–C(4)                     | 1.35367 |                  | 1.35593 |
| C(2)–N(3)                     | 1.35225 |                  | 1.38936 |
| C(2)–N(2)                     | 1.32724 |                  | 1.33909 |
| C(1)–C(2)                     | 1.47443 |                  | 1.49083 |
| N(4)–O(1N4)                   | 1.28877 |                  | 1.36599 |
| N(4)–O(2N4)                   | 1.22059 |                  | 1.29077 |
| N(4)–O(3N4)                   | 1.23688 |                  | 1.27127 |
|                               |         | Angles / °       |         |
| O(1N4)–Cu–O(1N4) <sup>i</sup> | 180.0   |                  | 179.677 |
| O(1)–Cu–O(1) <sup>i</sup>     | 180.0   |                  | 179.685 |
| N(2)–Cu–N(2) <sup>i</sup>     | 180.0   |                  | 179.859 |
| O(1N4)–Cu–O(1)                | 99.492  |                  | 102.062 |
| O(1N4)–Cu–N(2)                | 86.483  |                  | 87.640  |
| O(1)–Cu–N(2)                  | 70.911  |                  | 71.686  |
| N(2)–Cu–O(1) <sup>i</sup>     | 109.089 |                  | 108.432 |
| Cu–O(1N4)–N(4)                | 121.150 |                  | 121.219 |
| O(1N4)–N(8)–O(2N4)            | 120.487 |                  | 118.200 |
| O(1N4)–N(4)–O(3N4)            | 117.018 |                  | 117.327 |
| O(2N4)–N(4)–O(3N4)            | 122.495 |                  | 124.474 |
| Cu–O(1)–N(1)                  | 107.401 |                  | 107.173 |
| O(1)–N(1)–O(2)                | 124.115 |                  | 124.837 |
| O(1)–N(1)–C(3)                | 118.081 |                  | 117.111 |
| N(1)–C(3)–N(2)                | 120.650 |                  | 120.792 |
| N(1)–C(3)–C(4)                | 128.354 |                  | 128.587 |
| C(3)–C(4)–N(3)                | 104.750 |                  | 104.020 |
| C(4)–N(3)–C(2)                | 109.450 |                  | 109.888 |
| N(2)–C(2)–N(3)                | 109.295 |                  | 108.115 |
| C(3)–N(2)–C(2)                | 105.544 |                  | 107.386 |
| N(3)–C(2)–C(1)                | 124.415 |                  | 125.377 |
| N(2)–C(2)–C(1)                | 126.290 |                  | 126.506 |
| Cu–N(2)–C(2)                  | 131.698 |                  | 130.308 |
| Cu–N(2)–C(3)                  | 122.621 |                  | 122.182 |

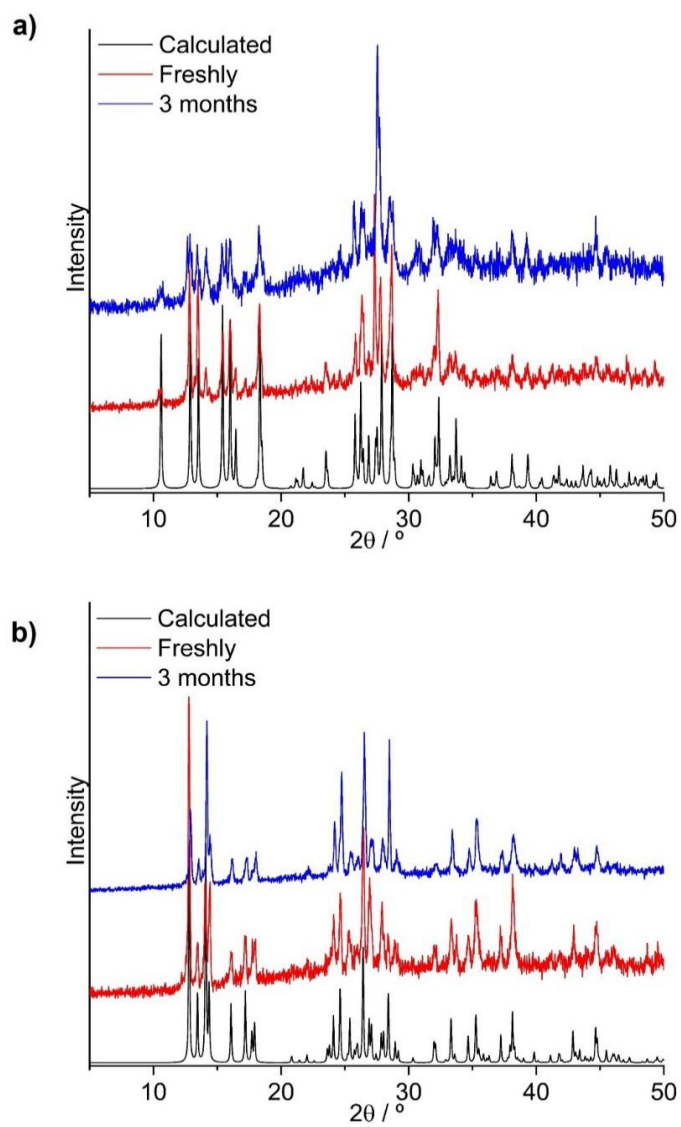

**Figure S1.** Powder X-ray diffraction patterns recorded (black line) and calculated (red line) for **(a)**  $[\text{Cu}(\text{2mni})_2(\text{H}_2\text{O})_2](\text{NO}_3)_2 \cdot 2\text{H}_2\text{O}$  (**1**) and **(b)**  $[\text{Cu}(\text{2mni})_2(\text{NO}_3)_2]$  (**2**).

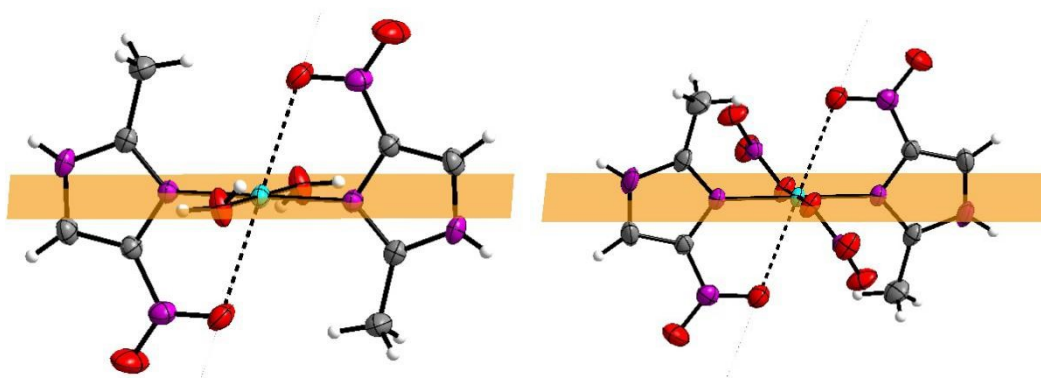

**Figure S2.** Plans obtained for **(a)**  $[\text{Cu}(\text{2mni})_2(\text{H}_2\text{O})_2](\text{NO}_3)_2(\text{H}_2\text{O})_2$  (**1**) and **(b)**  $[\text{Cu}(\text{2mni})_2(\text{NO}_3)_2]$  (**2**).

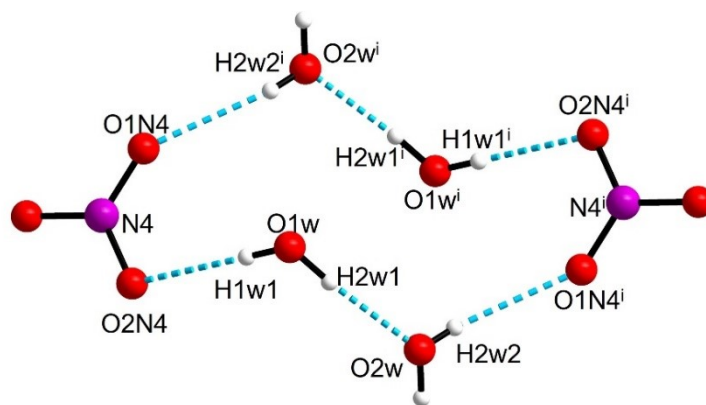

**Figure S3.** Ring forming by the hydrogens bond in **1**.

**Table S3.** Selected structural parameter for compounds analogous to **1** and **2**

| Compound                                                                                                                                            | Cu–O <sub>axial</sub> / Å | Ring members | Tetragonality parameter ( $\tau$ ) | Ref. |
|-----------------------------------------------------------------------------------------------------------------------------------------------------|---------------------------|--------------|------------------------------------|------|
| <b>1</b>                                                                                                                                            | 2.606(14)                 | 5            | 0.756                              | #    |
| <b>2</b>                                                                                                                                            | 2.594(15)                 | 5            | 0.764                              | #    |
| <b>A</b> [Cu(emizco) <sub>2</sub> (H <sub>2</sub> O) <sub>2</sub> ](NO <sub>3</sub> ) <sub>2</sub>                                                  | 2.519(15)                 | 5            | 0.789                              | 1    |
| <b>B</b> [Cu(tdaH <sub>2</sub> ) <sub>2</sub> (H <sub>2</sub> O) <sub>2</sub> ] $\cdot$ 2H <sub>2</sub> O                                           | 2.490(2)                  | 5            | 0.792                              | 2    |
| <b>C</b> [Cu(cpt) <sub>2</sub> (H <sub>2</sub> O) <sub>2</sub> ](MeOH) <sub>2</sub>                                                                 | 2.463(2)                  | 5            | 0.804                              | 3    |
| <b>D</b> [Cu(atNO <sub>2</sub> EtOH) <sub>2</sub> (H <sub>2</sub> O) <sub>2</sub> ]                                                                 | 2.405(2)                  | 6            | 0.823                              | 4    |
| <b>E</b> [Cu(C <sub>2</sub> H <sub>3</sub> N <sub>6</sub> O <sub>2</sub> ) <sub>2</sub> (H <sub>2</sub> O) <sub>2</sub> ] $\cdot$ 2H <sub>2</sub> O | 2.393(1)                  | 6            | 0.829                              | 5    |
| <b>F</b> [Cu(atNO <sub>2</sub> EtCl) <sub>2</sub> (H <sub>2</sub> O) <sub>2</sub> ] $\cdot$ 2H <sub>2</sub> O                                       | 2.367(1)                  | 6            | 0.838                              | 4    |
| <b>G</b> [Cu(ron) <sub>2</sub> (H <sub>2</sub> O) <sub>2</sub> ](NO <sub>3</sub> ) <sub>2</sub>                                                     | 2.336(3)                  | 7            | 0.849                              | 6    |
| <b>H</b> [Cu(C <sub>2</sub> H <sub>3</sub> N <sub>6</sub> O <sub>2</sub> ) <sub>2</sub> (H <sub>2</sub> O) <sub>2</sub> ](MeOH) <sub>2</sub>        | 2.326(2)                  | 6            | 0.851                              | 5    |

Where: TDAH2 = 1,2,3-triazole-4,5-dicarboxylic acid; CPT = 1-(3,5-dinitro-1H-pyrazol-4-yl)-3-nitro-1H-1,2,4-triazol-5-amine; C<sub>2</sub>H<sub>3</sub>N<sub>6</sub>O<sub>2</sub> = 1-methyl-5-nitriminotetrazole; emizco = ethyl 5-methyl-4-imidazolecarboxylate; AtNO<sub>2</sub>EtOH = 1-(2-Hydroxyethyl)-5-nitriminotetrazole and AtNO<sub>2</sub>EtOH = 1-(2-Chloroethyl)-itriminotetrazole; ron = (1-methyl-5-nitro-1H-imidazol-2-yl)methylcarbamate. #This work.

**Table S4.** Product **1** hydrogen bonds list, in Ångstroms (Å) and angles in degrees (°)

| D–H...A                             | d(D–H)  | d(H...A) | d(D...A)   | $\angle$ (DHA) |
|-------------------------------------|---------|----------|------------|----------------|
| O(1W)–H(1W1)...O(2N4)               | 0.76(3) | 2.02(3)  | 2.778(2)   | 179(3)         |
| O(1W)–H(2W1)...O(2W)                | 0.84(2) | 1.80(3)  | 2.6409(19) | 175(2)         |
| C(1)–H(1B)...O(1) <sup>i</sup>      | 0.90(3) | 2.61(3)  | 3.417(2)   | 151(2)         |
| C(1)–H(1C)...O(2) <sup>ii</sup>     | 0.90(3) | 2.64(3)  | 3.410(3)   | 144(2)         |
| N(3)–H(1N3)...O(3N4) <sup>iii</sup> | 0.75(2) | 2.29(2)  | 2.924(2)   | 143(2)         |
| C(4)–H(4)...O(1) <sup>iv</sup>      | 0.91(2) | 2.52(2)  | 3.416(2)   | 166.2(16)      |
| O(2W)–H(1W2)...O(3N4) <sup>ii</sup> | 0.82(3) | 2.09(3)  | 2.866(2)   | 159(3)         |
| O(2W)–H(2W2)...O(1N4) <sup>v</sup>  | 0.71(3) | 2.19(3)  | 2.872(2)   | 161(3)         |

Symmetry transformations used to generate equivalent atoms:

- (i)  $-x+1, -y+1, -z+1$  (ii)  $x, -y+3/2, z-1/2$  (iii)  $-x+1, -y+2, -z+1$   
 (iv)  $-x+1, y+1/2, -z+3/2$  (v)  $-x+2, -y+1, -z+1$

**Table S5.** Product **2** hydrogen bonds list, in Ångstroms (Å) and degrees (°)

| D–H...A                            | d(D–H)  | d(H...A) | d(D...A) | <(DHA) |
|------------------------------------|---------|----------|----------|--------|
| N(3)–H(3N3)...O(3N4) <sup>ii</sup> | 0.84(3) | 2.00(3)  | 2.837(2) | 173(3) |

Symmetry transformations used to generate equivalent atoms:

(ii)  $-x+1/2, y-1/2, -z+1/$ 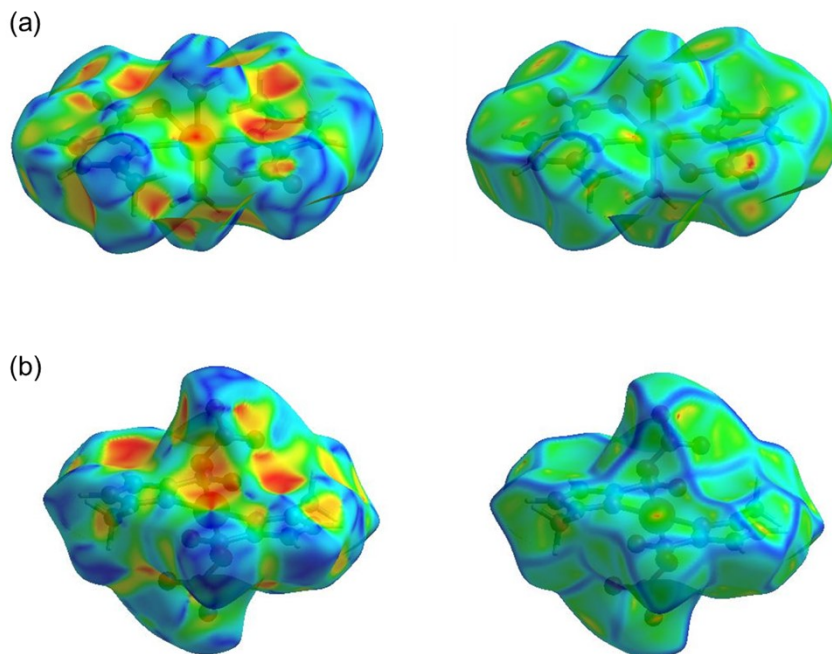

**Figure S4.** Hirshfeld surfaces mapped for shape index and curvedness, respectively, for (a) **1** and (b) **2**. This method also allows us to calculate unique shape properties for the molecules, as shape index and curvedness. The shape index can show subtle changes in the molecule surface shape, where the blue parts suggest convex regions and the red, the concave regions and are present in both **1** and **2** surface, being more evident at product **2**. A slight difference is also observed in the curvedness surface of the products, with the predominance of green areas of low values of curvedness in **1** when compared to **2**. Whereas sharp curvature areas assigned by the blue color are more defined in **2**. These structural and conformational differences can be mainly attributed to the shape and size of the ligands, once the water molecules at **1** are smaller than the nitrate group of product **2** leading to a less bulky structure.

**Table S6.** Percentage contributions from the other different interatomic contacts to the Hirshfeld surface of **1** and **2**

| Contact     | Product 1        | Product 2        |
|-------------|------------------|------------------|
|             | Contribution / % | Contribution / % |
| H...O/O...H | 60.8             | 51.4             |
| N...H/H...N | 2.0              | 6.4              |
| C...H/H...C | 2.3              | 9.8              |
| C...N/N...C | 1.4              | 0.0              |
| N...O/O...N | 3.6              | 8.0              |
| C...O/O...C | 3.7              | 2.2              |
| H...H       | 22.0             | 9.5              |

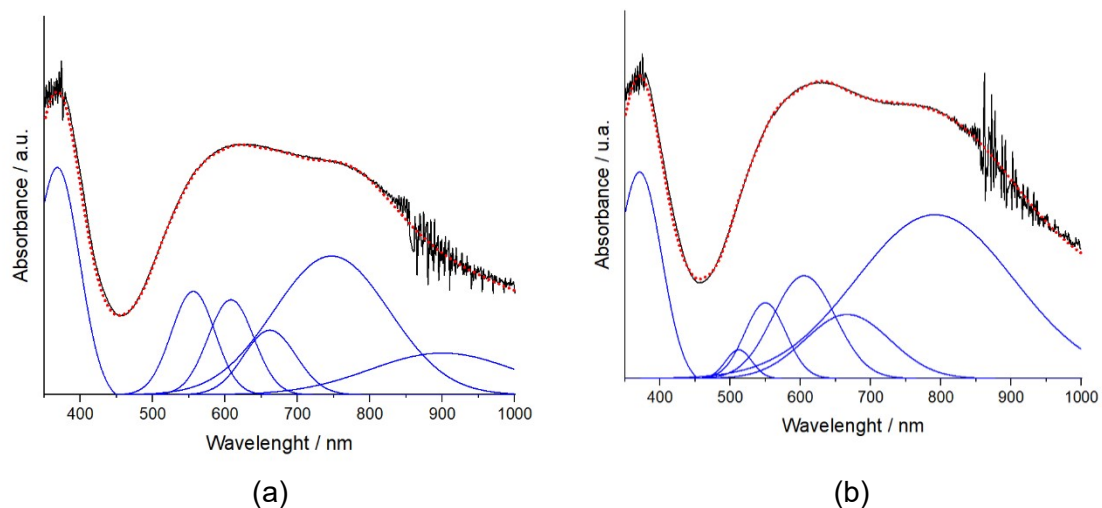

**Figure S5.** Solid-state UV-Vis spectrum for compounds **1** (a) and **2** (b).

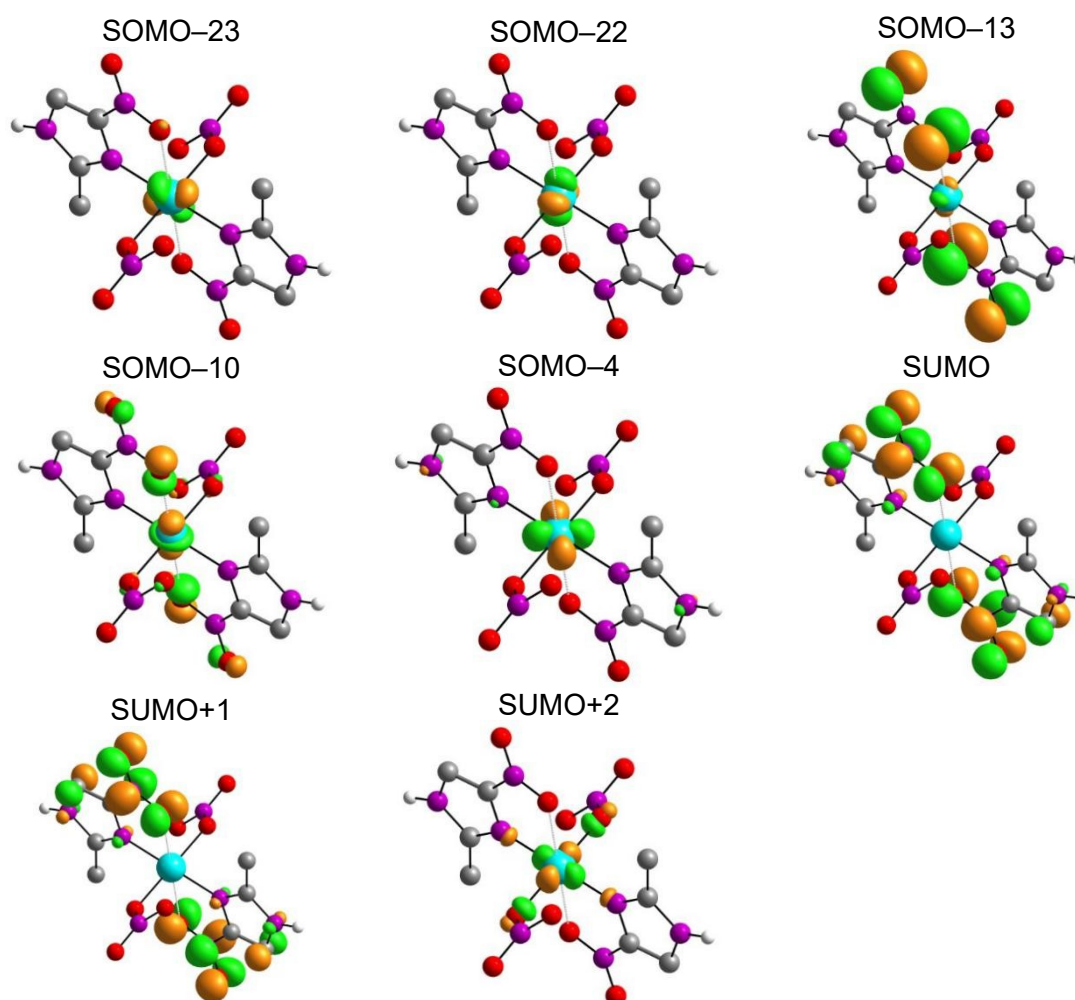

**Figure S6.** Representation of selected frontier molecular orbitals involved in the UV-vis absorptions calculated for **2**. SUMO and SOMO denotes the single unoccupied molecular orbital and the single occupied molecular orbital, respectively.

**Table S7.** Tentative assignments for the FTIR ( $\text{cm}^{-1}$ ) spectra registered and calculated for product **1** and **2**

| Tentative assignments                    | <b>1</b><br>Experimental | <b>1</b><br>Calculated | <b>2</b><br>Experimental | <b>2</b><br>Calculated |
|------------------------------------------|--------------------------|------------------------|--------------------------|------------------------|
| $\nu(\text{O-H})$                        | 3180                     | 3320                   | –                        | –                      |
| $\nu(\text{N-H})$                        | 3180                     | 3320                   | 3560                     | 3669                   |
| $\nu_s(\text{C-H})$                      | 3084                     | 3058                   | 3117                     | 3157                   |
| $\nu_{as}(\text{N-O})$                   | 1587                     | 1602                   | 1595                     | 1609                   |
| $\nu_s(\text{C=N})_{\text{ring}}$        | 1543 and 1477            | 1566 and 1509          | 1541 and 1518            | 1577 and 1529          |
| $\nu_{as}(\text{NO}_3)_{\text{nitrate}}$ | 1383                     | 1379                   | –                        | –                      |
| $\nu_s(\text{NO}_2)_{\text{nitrate}}$    | –                        | –                      | 1246                     | 1222                   |
| $\nu_s(\text{N-O})$                      | 1383                     | 1379                   | 1385                     | 1409                   |
| $\nu_s(\text{NO}_3)_{\text{nitrate}}$    | 1034                     | 1067                   | –                        | –                      |
| $\nu_s(\text{C=N})_{\text{ring}}$        | 1300 and 1240            | 1306 and 1202          | 1246                     | 1222                   |
| $\delta(\text{C-N-C})$                   | 1115                     | 1148                   | 1115                     | 1137                   |
| $\delta(\text{NO}_3)$                    | 748                      | 732                    | –                        | –                      |
| $\delta(\text{NO}_2)$                    | –                        | –                      | 748                      | 741                    |
| $\delta(\text{C-H})$                     | 675                      | 645                    | 675                      | 686                    |

$\nu$  = stretching,  $\nu_{as}$  = asymmetric stretching,  $\nu_s$  = symmetric stretching,  $\delta$  = in-plane angular deformation.

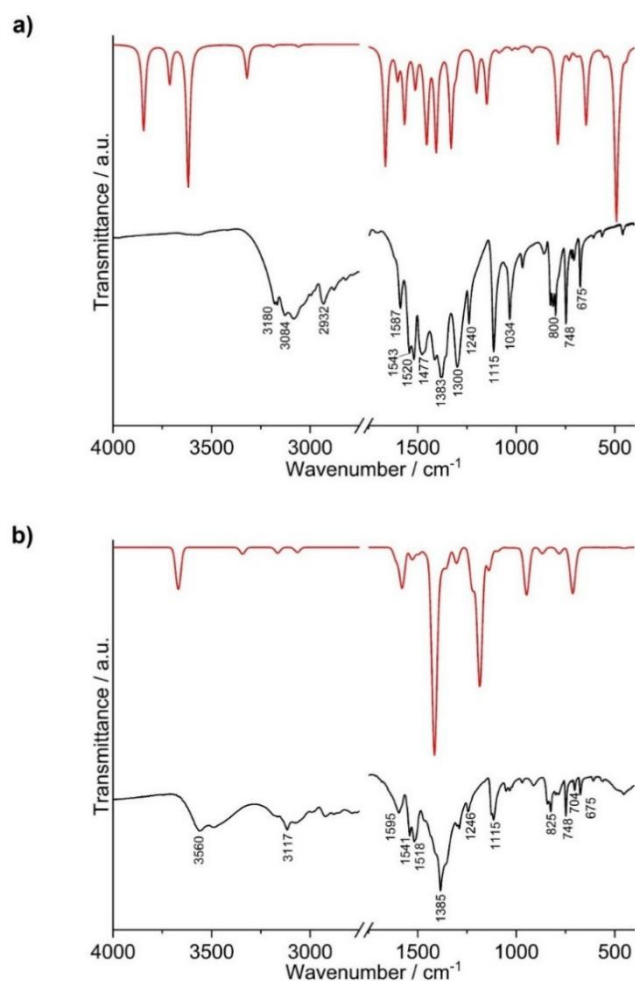

**Figure S7.** Experimental (black line) and calculated (red line) FTIR spectra for (a)  $[\text{Cu}(\text{2mni})_2(\text{H}_2\text{O})_2](\text{NO}_3)_2(\text{H}_2\text{O})_2$  (**1**) and (b)  $[\text{Cu}(\text{2mni})_2(\text{NO}_3)_2]$  (**2**).

**Table S8.** Tentative assignments for the Raman scattering spectra registered and calculated for products **1** and **2**

| Tentative assignments           | <b>1</b><br>Experimental | <b>1</b><br>Calculated | <b>2</b><br>Experimental | <b>2</b><br>Calculated |
|---------------------------------|--------------------------|------------------------|--------------------------|------------------------|
| $\delta(\text{N-H})$            | 1542                     | 1566                   | 1545 and 1521            | 1577 and 1529          |
| $\nu_{\text{as}}(\text{N-O})$   | 1461                     | 1453                   | 1460                     | 1448                   |
| $\tau(\text{CH})$               | 1395 and 1373            | 1407 and 1379          | 1372                     | 1381                   |
| $\beta(\text{CH})$              | 1300                     | 1306                   | 1300                     | 1303                   |
| $\nu(\text{C-N})_{\text{ring}}$ | 1241 and 1052            | 1222 and 1067          | 1238 and 1051            | 1222 and 1080          |
| $\delta(\text{C-N-C})$          | 1118                     | 1148                   | 1118                     | 1137                   |
| $\nu(\text{C-C})_{\text{ring}}$ | 1028 and 830             | 1021 and 919           | 1028 and 830             | 1034 and 867           |
| $\delta(\text{N-H})$            | 742 and 708              | 732 and 700            | 745 and 709              | 741 and 714            |
| $\nu(\text{Cu-N})$              | 563 and 456              | 553 and 442            | 562 and 450              | 555 and 451            |
| $\nu(\text{Cu-O})$              | 309                      | 308                    | 311                      | 314                    |
| Skeleton motions                | $\leq 400$               | –                      | $\leq 400$               | –                      |

$\nu$  = stretching,  $\nu_{\text{as}}$  = asymmetric stretching,  $\nu_{\text{s}}$  = symmetric stretching,  $\delta$  = in-plane angular deformation,  $\tau$  = out-of-plane bending (twisting),  $\beta$  = in-plane bending.

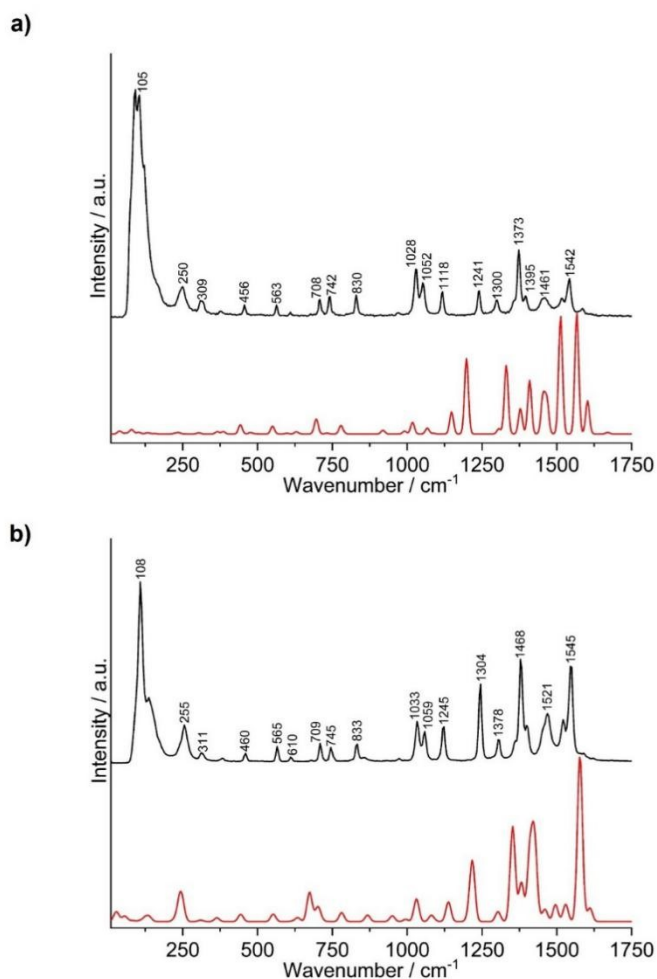

**Figure S8.** Experimental (black line) and calculated (red line) Raman spectra for (a)  $[\text{Cu}(\text{2mni})_2(\text{H}_2\text{O})_2](\text{NO}_3)_2 \cdot (\text{H}_2\text{O})_2$  (**1**) and (b)  $[\text{Cu}(\text{2mni})_2(\text{NO}_3)_2]$  (**2**).



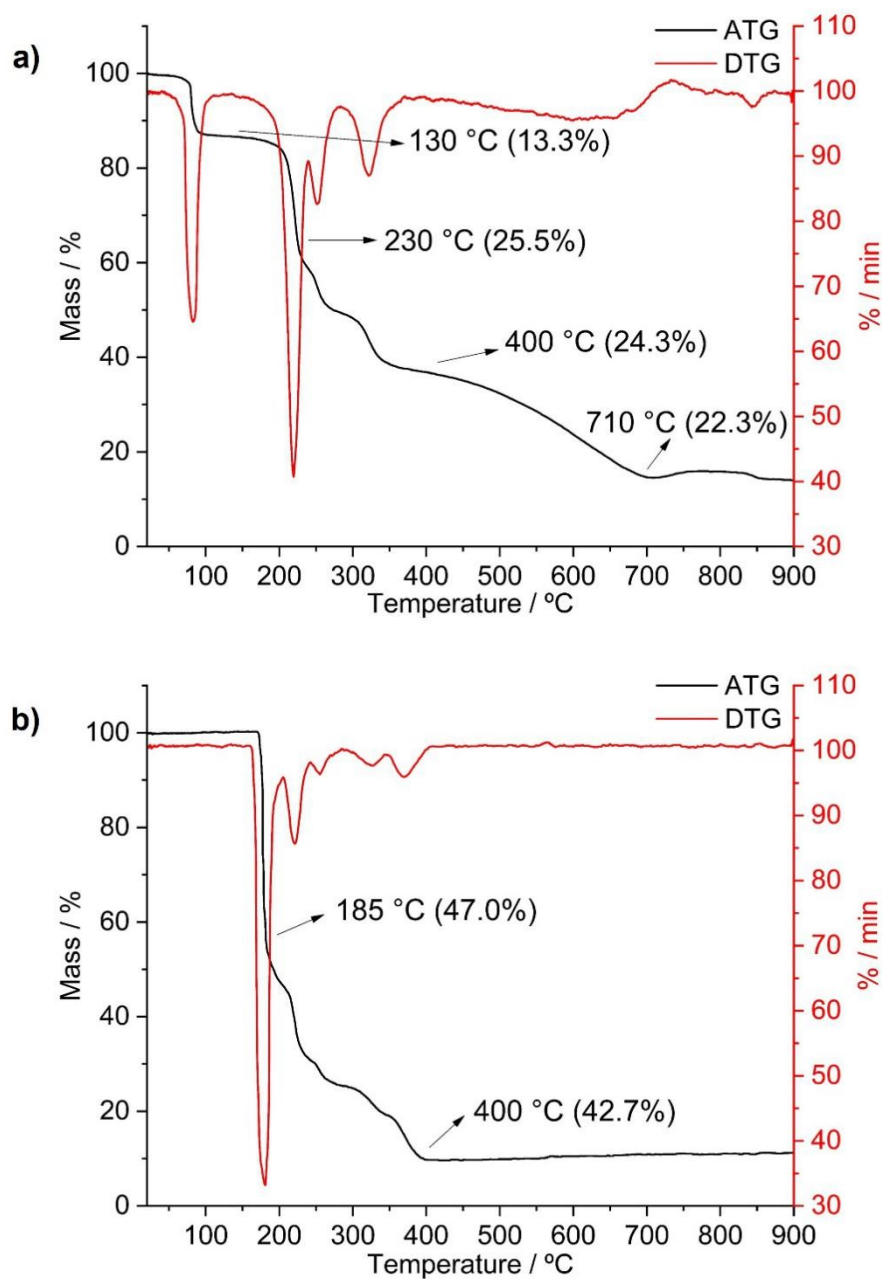

**Figure S9.** Thermogram and derivative thermogram (DTG, red) results for (a) product **1** and (b) **2** with the weight loss steps evidenced. The thermograms were obtained in  $N_2/O_2$  atmosphere and temperature range of 25 to 900 °C.

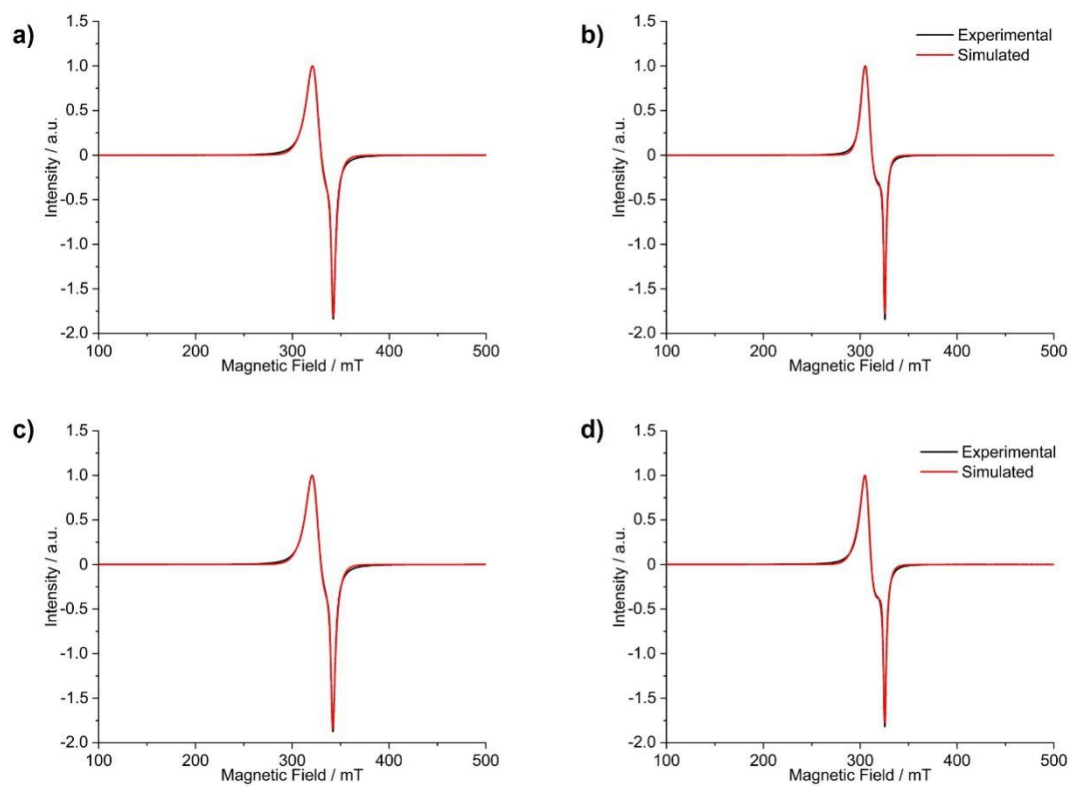

**Figure S10.** X-band EPR spectra in solid state at room temperature for (a) **1** and (c) **2**; and at 77 K for (b) **1** and (d) **2**. The experimental spectra are shown in black and the simulations run with EasySpin in red.

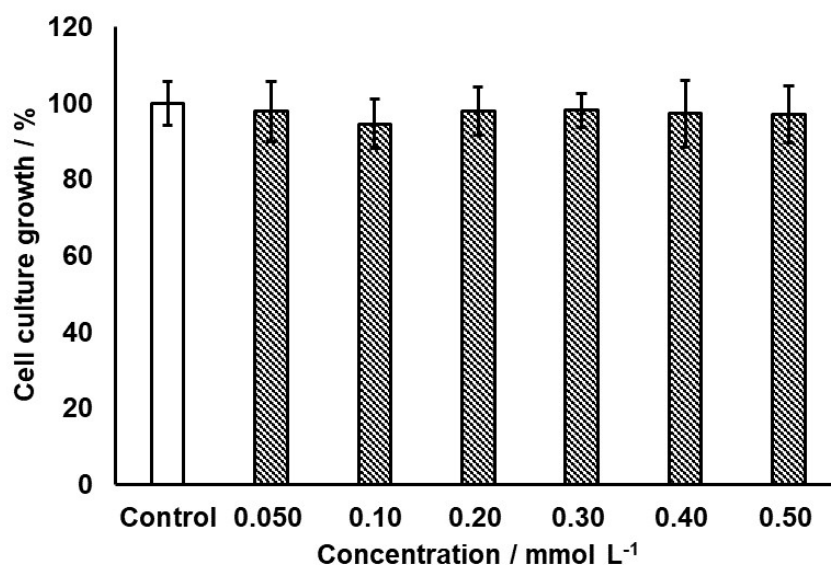

**Figure S11.** Growth inhibition assay in *E. coli* suspensions treated with 2-methyl-4(5)-nitroimidazole in concentrations from 0.050 to 0.50 mmol L<sup>-1</sup>; Data were obtained after three hours of incubation at 37 °C and 120 rpm in triplicates and are given as average values and standard deviations. The OD<sub>595</sub> value for the control was 0.930±0.068 considered 100% of growth.

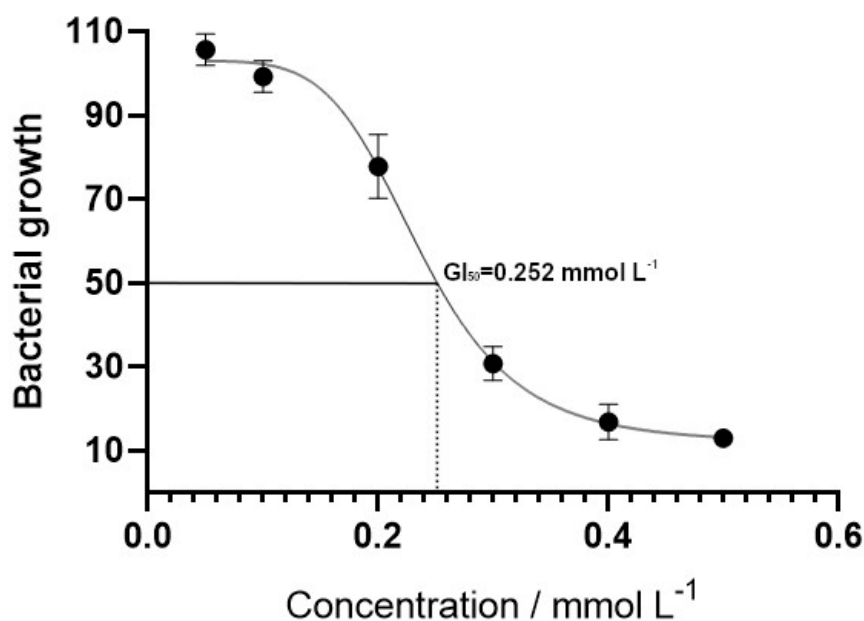

**Figure S12.** *E. coli* IC<sub>50</sub> values determined in cytotoxicity essays with **1** in concentrations from 0.050 to 0.50 mmol L<sup>-1</sup>, for 3 h. Data are presented as mean ±SD of three independent experiments. The solid lines represent the best fit curves as described in the Experimental section.

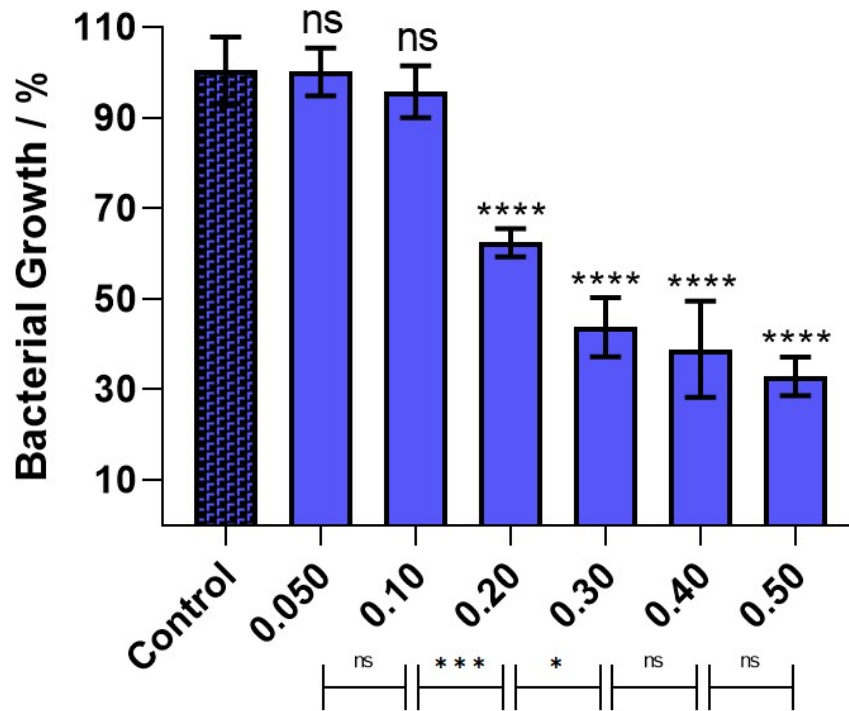

**Figure S13.** Growth inhibition assay in *E. coli* suspensions treated with copper nitrate in concentrations from 0.050 to 0.50 mmol L<sup>-1</sup>; Data were obtained after three hours of incubation at 37 °C and 120 rpm in triplicates and are given as average values and standard deviations. ns = not statistically significant, \*\*\*\* = p < 0.0001 when compared to the control assay

## REFERENCES

1. J. Montes-Ayala, C. Escartín-Guzmán, S. E. Castillo-Blum, E. O. Rodríguez-Hernández, S. Bernès, M. J. Rosales-Hoz and N. Barba-Behrens, *J Inorg Biochem*, 2005, **99**, 1676-1684.
2. J. R. Olson, M. Yamauchi and W. M. Butler, *Inorganica Chimica Acta*, 1985, **99**, 121-128.
3. C. Li, M. Zhang, Q. Chen, Y. Li, H. Gao, W. Fu and Z. Zhou, *Dalton Transactions*, 2016, **45**, 17956-17965.
4. J. Stierstorfer, K. R. Tarantik and T. M. Klapötke, *Chemistry – A European Journal*, 2009, **15**, 5775-5792.
5. G. Geisberger, T. M. Klapötke and J. Stierstorfer, *European Journal of Inorganic Chemistry*, 2007, **2007**, 4743-4750.
6. P. García-Holley, N. Ortiz-Pastrana, R. A. Toscano, M. Flores-Álamo and N. Barba-Behrens, *Polyhedron*, 2016, **104**, 127-137.
